# Supplementary material for: Associations between sleep duration, sleep quality, and weight status in Chinese children and adolescents
Source: PubMed Central journal article supplement (PMC9172025; doi:10.1186/s12889-022-13534-w), 2022-06-07
Supplement: 12889_2022_13534_MOESM1_ESM.pdf [file 12889_2022_13534_MOESM1_ESM.pdf]

**Additional file 1:** Age- and sex-specific body mass index (BMI) cutoff points for Chinese children and adolescents

| Age (years) | Male       |         | Female     |         |
|-------------|------------|---------|------------|---------|
|             | Overweight | Obesity | Overweight | Obesity |
| 6.0~        | 16.4       | 17.4    | 16.2       | 17.5    |
| 6.5~        | 16.7       | 18.1    | 16.5       | 18.0    |
| 7.0~        | 17.0       | 18.7    | 16.8       | 18.5    |
| 7.5~        | 17.4       | 19.2    | 17.2       | 19.0    |
| 8.0~        | 17.8       | 19.7    | 17.6       | 19.4    |
| 8.5~        | 18.1       | 20.3    | 18.1       | 19.9    |
| 9.0~        | 18.5       | 20.8    | 18.5       | 20.4    |
| 9.5~        | 18.9       | 21.4    | 19.0       | 21.0    |
| 10.0~       | 19.2       | 21.9    | 19.5       | 21.5    |
| 10.5~       | 19.6       | 22.5    | 20.0       | 22.1    |
| 11.0~       | 19.9       | 23.0    | 20.5       | 22.7    |
| 11.5~       | 20.3       | 23.6    | 21.1       | 23.3    |
| 12.0~       | 20.7       | 24.1    | 21.5       | 23.9    |
| 12.5~       | 21.0       | 24.7    | 21.9       | 24.5    |
| 13.0~       | 21.4       | 25.7    | 22.6       | 25.0    |
| 13.5~       | 21.9       | 25.7    | 22.6       | 25.6    |
| 14.0~       | 22.3       | 26.1    | 22.8       | 25.9    |
| 14.5~       | 22.6       | 26.4    | 23.0       | 26.3    |
| 15.0~       | 22.9       | 26.6    | 23.2       | 26.6    |
| 15.5~       | 23.1       | 26.9    | 23.4       | 26.9    |
| 16.0~       | 23.3       | 27.1    | 23.6       | 27.1    |
| 16.5~       | 23.5       | 27.4    | 23.7       | 27.4    |
| 17.0~       | 23.7       | 27.6    | 23.8       | 27.6    |
| 17.5~       | 23.8       | 27.8    | 23.8       | 27.8    |
| 18.0        | 24.0       | 28.0    | 24.0       | 28.0    |
